# Supplementary material for: Past fire dynamics inferred from polycyclic aromatic hydrocarbons and monosaccharide anhydrides in a stalagmite from the archaeological site of Mayapan, Mexico
Source: Copernicus journal article supplement (doi:10.5194/bg-2023-63), 2023-04-12

# Levoglucosan and $\Sigma 15$ PAHs

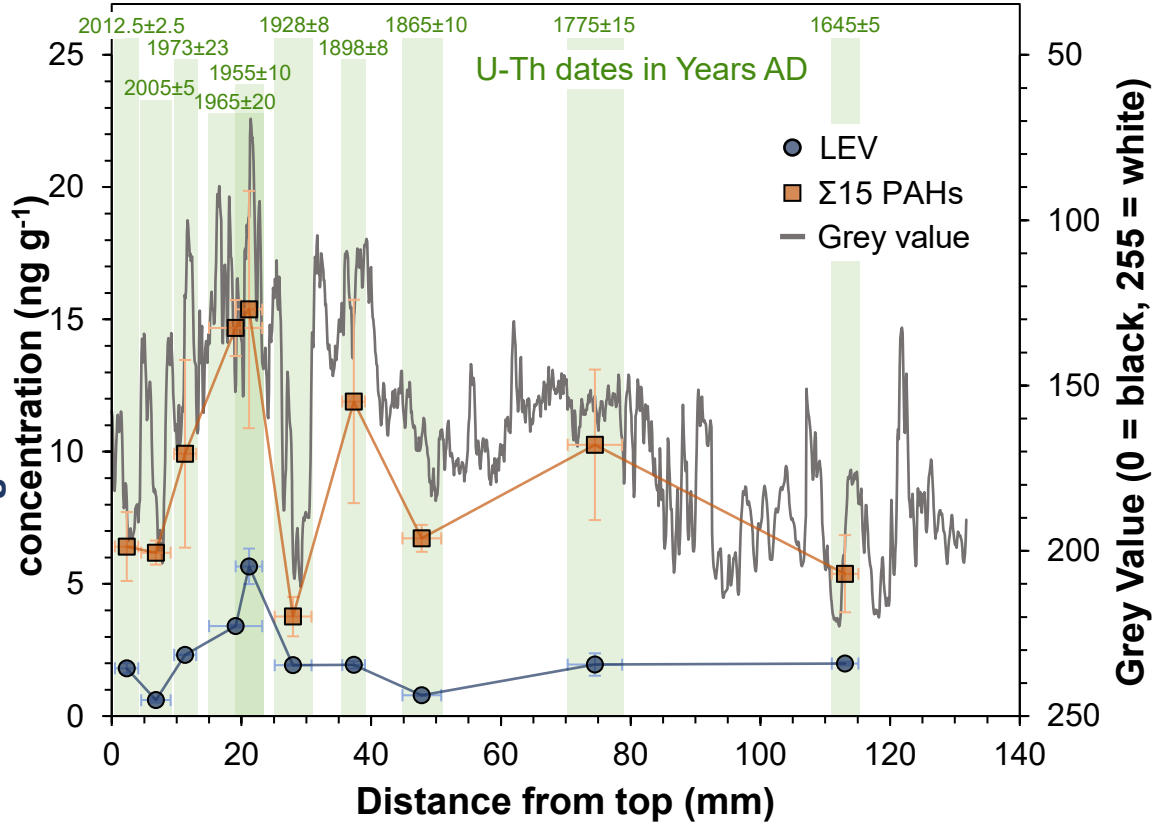

Supplement: Supplementary file [file bg-2023-63-AC2-supplement.pdf]
